# Supplementary material
Source: publisher figshare collection journal article supplement (https://frontiersin.figshare.com/ndownloader/files/23335514)
Supplement: Supplementary file 1 [file 23335514]

Supplementary Information to

What does it take to go net-zero-CO2?

A life cycle assessment on long-term storage of intermittent renewables with chemical energy carriers

Jan Bernard Wevers1, Li Shen1 and Mijndert van der Spek2

1 Copernicus Institute of Sustainable Development, Utrecht University, Utrecht, The Netherlands

2 Research Centre for Carbon Solutions, School of Engineering and Physical Sciences, Heriot Watt University, Edinburgh, Scotland

# System dimensioning of the P-H-P and P-A-P system


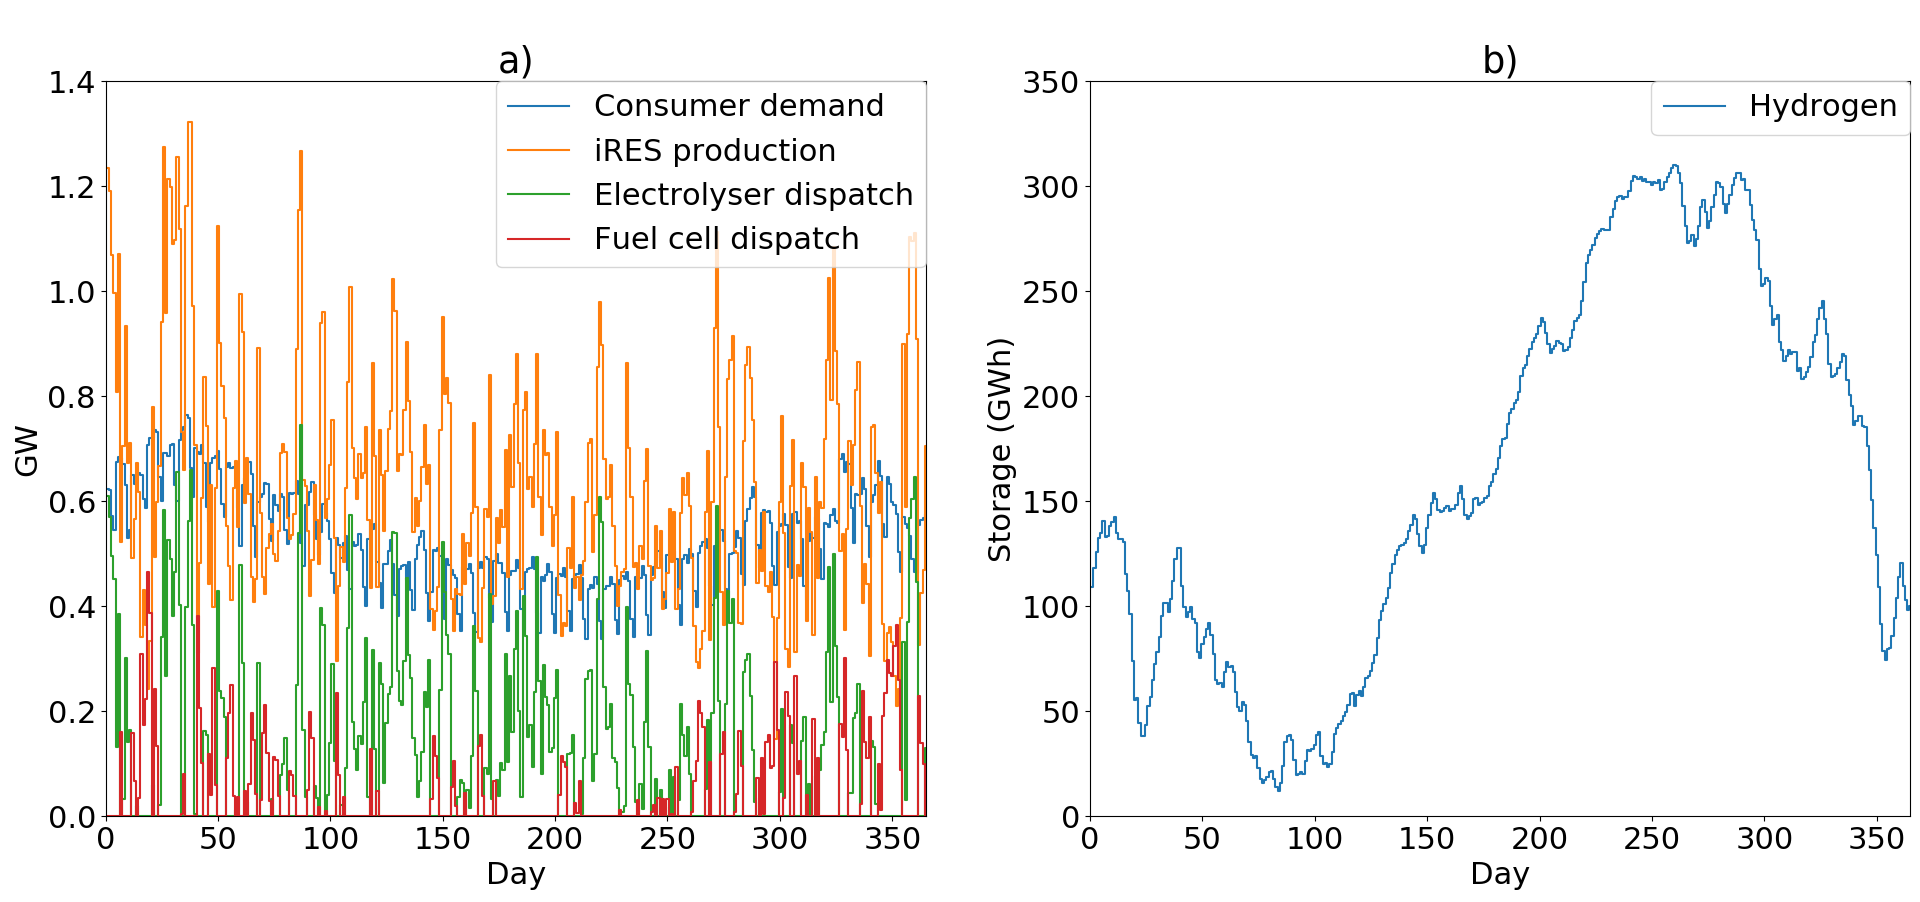


Figure SI1. Graphs showing the daily operation of the P-H-P system with meteorological data from 2015, with day 1 as January first. a) Daily fluctuations in the input data (Consumer demand and iRES) and the resulting dispatch of the electrolyser and fuel cell (GW). The maximum consumer demand is set to 1GW. Due to the fact that this maximum is not maintained for a complete day the maximum of the daily averaged data is lower (763 MW). b) Resulting hydrogen storage profile (GWh).


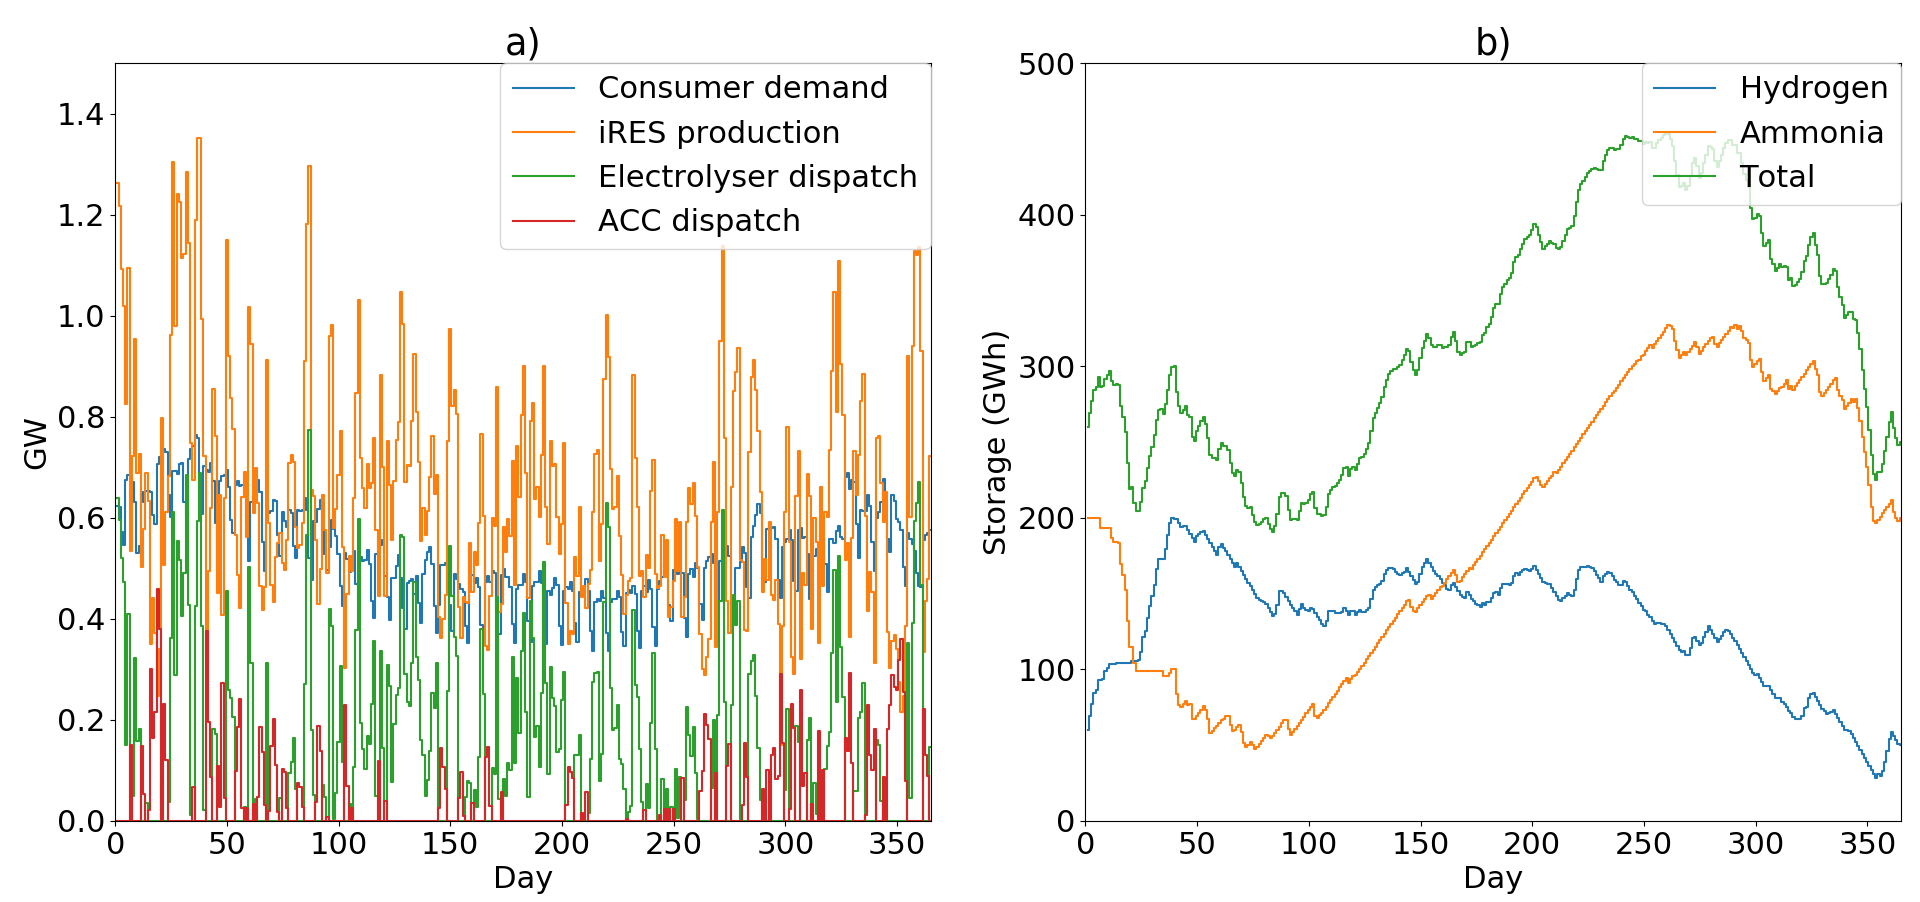


Figure SI2. Graphs showing the daily operation of the P-A-P system with meteorological data from 2015, with day 1 as January first. a) Daily fluctuations in the input data (Consumer demand and iRES) and the resulting dispatch of the electrolyser and ACC (GW). The maximum consumer demand is set to 1GW. Due to the fact that this maximum is not maintained for a complete day the maximum of the daily averaged data is lower (763 MW). b) Resulting hydrogen and ammonia storage profile (GWh) and the combined value.

# Modelling assumptions

Table SI1. Assumed natural gas supply basket for CWE in 2050.

| Country | % of total |
| --- | --- |
| Germany | 5% |
| Great Britain | 10% |
| Netherlands | 10% |
| Norway | 30% |
| Russia | 45% |

Table SI2. Variation to input parameters in the sensitivity analysis.

|  | Minimum | Maximum |
| --- | --- | --- |
| Electrolysis efficiency | -10 % | +10% |
| Fuel Cell efficiency | -10 % | +10% |
| NGCC+PCC efficiency | -5 % | +5 % |
| Methanation efficiency | -5 % | +5 % |
| ACC efficiency | -10 % | +10 % |
| Ammonia production efficiency | -10 % | +10 % |
| iRES background impact | -10 % | +40 % |
| Percentage of iRES stored | -25 % | +25 % |
| DAC energy use | -15 % | +15 % |
| Natural gas background impact | -10 % | +20 % |

# Life cycle impact breakdown by emission type

Figure SI3. Cradle-to-factory gate global warming impact of 1 kWh dispatchable electricity of the five studied production systems, breakdown by emission type.

Figure SI4. Cradle-to-factory gate Photochemical Ozone Formation impact of 1 kWh dispatchable electricity of the five studied production systems, breakdown by emission type.

Figure SI5. Cradle-to-factory gate Particulate Matter formation impact of 1 kWh dispatchable electricity of the five studied production systems, breakdown by emission type.

Figure SI6. Cradle-to-factory gate Terrestrial Acidification Formation impact of 1 kWh dispatchable electricity of the five studied production systems, breakdown by emission type.

Figure SI7. Cradle-to-factory gate Marine Eutrophication impact of 1 kWh dispatchable electricity of the five studied production systems, breakdown by emission type.

Figure SI8. Cradle-to-factory gate Mineral Resource Scarcity impact of 1 kWh dispatchable electricity of the five studied production systems, breakdown by mineral type.

Mineral resource scarcity is dependent on a wide range of minerals. Iron and Nickel are the biggest contributors and constitute more than 75% of the impact in the natural gas-based systems. In the P-X-P systems these two substances are still the biggest contributors, but they only constitute 30% - 36%. The P-X-P systems use more aluminium, copper, platinum and the ‘remaining substances’ have a larger value and are spread over a large amount of substances. The detailed breakdown per inventory substance can be found in Appendix A.

Figure SI9. Cradle-to-factory gate Fossil Resource Scarcity impact of 1 kWh dispatchable electricity of the five studied production systems, breakdown by fossil resource type.

# Life cycle inventories

Table SI3. Hydrogen production from electrolysis, with PEM electrolyser based on work from (Zhang et al., 2017)

| **Products** | | |
| --- | --- | --- |
| hydrogen, gaseous, 100 bar, from PEM electrolysis | 1 | Nm3 |
| **Technosphere Inputs** | | |
| water, deionised, from tap water, at user | 1.10E+00 | kg |
| PEM electrolyzer, Balance of Plant | 2.53E-11 | p |
| PEM electrolyzer, Operation and Maintenance | 1.65E-03 | hr |
| PEM electrolyzer, Stack | 6.99E-11 | p |
| PEM electrolyzer, ACDC Converter | 2.53E-11 | p |
| diaphragm compressor module, high pressure, at plant | 1.51E-08 | p |
| electricity, low voltage | 4.75E+00 | kWh |
| **Emissions to air** | | |
| oxygen | 3.53E-01 | kg |

Table SI4. Direct air capture based on Climeworks data (Wurzbacher & Ag, 2018)

| **Products** | | |
| --- | --- | --- |
| carbon dioxide, captured from atmosphere | 1 | kg |
| **Resources** | | |
| Carbon dioxide, in air | 1.00E+00 | kg |
| **Technosphere Inputs** | | |
| chemical, organic | 3.56E-03 | kg |
| carbon dioxide capture system | 1.10E-07 | p |
| Electricity from system | 1.13 | kWh |
| Heat pump, 4kW | 1.29E-06 | p |

Table SI5. Direct air capture with waste heat utilisation from methanation

| **Products** | | |
| --- | --- | --- |
| carbon dioxide, captured from atmosphere | 1 | kg |
| **Resources** | | |
| Carbon dioxide, in air | 1.00E+00 | kg |
| **Technosphere Inputs** | | |
| chemical, organic | 3.56E-03 | kg |
| carbon dioxide capture system | 1.10E-07 | p |
| Waste heat, from methanation | 1.750 | kWh |
| Electricity form system | 0.250 | kWh |

Table SI6. Methane production, based on (Müller, Müller, Teichmann, & Arlt, 2011)

| **Products** | | |
| --- | --- | --- |
| methane, from thermo-chemical methanation | 1 | Nm3 |
| waste heat > 90C | 7.2 | kWh |
| water | 1.606 | kg |
| **Technosphere Inputs** | | |
| carbon dioxide, from PCC | 2.23 | kg |
| carbon dioxide, from DAC | 0.118 | kg |
| hydrogen, 100 bar | 4.5 | Nm3 |
| Sabatier reaction methanation unit | 6.34E-06 | p |
| Production of Ni-based catalyst for methanation | 5.07E-04 | kg |

Table SI7. Pipeline, supercritical CO2 from (Wildbolz, 2007)

| **Resources** |  |  |
| --- | --- | --- |
| Occupation, construction site | 3330 | m2a |
| Transformation, from forest | 2000 | m2 |
| Transformation, to heterogeneous, agricultural | 2000 | m2 |
| Water, unspecified natural origin/m3 | 187 | m3 |
| **Materials/fuels** |  |  |
| Sand, at mine/CH U | 4.40E+06 | Kg |
| Diesel, burned in building machine/GLO U | 3.31E+06 | MJ |
| Steel, low-alloyed, at plant/RER U | 2.70E+05 | Kg |
| Drawing of pipes, steel/RER U | 2.70E+05 | Kg |
| Rock wool, packed, at plant/CH U | 5119 | Kg |
| Transport, helicopter/GLO U | 26 | hr |
| Transport, helicopter, LTO cycle/GLO U | 10.4 | p |
| Transport, lorry 32t/RER U | 3.15E+05 | tkm |
| Transport, freight, rail/RER U | 5.51E+04 | tkm |
| **Waste to treatment** |  |  |
| Disposal, inert waste, 5% water, to inert material landfill/CH U | 4.40E+06 | kg |
| Disposal, steel, 0% water, to inert material landfill/CH U | 1.35E+05 | kg |
| Disposal, mineral wool, to final disposal/CH U | 5.12E+03 | kg |

Table SI8. Transport, pipeline, supercritical CO2 (Wildbolz, 2007)

| **Resources** |  | Unit/km |
| --- | --- | --- |
| Pipeline, supercritical CO2 | 6.34E-09 | km |
| **Emissions to air** |  |  |
| Carbon dioxide, fossil | 2.60E-04 | Kg |

Table SI9. Storage, CO2, depleted gas field, 200 km pipeline transport, pipeline from (Wildbolz, 2007)

| **Resources** |  | Per kg stored |
| --- | --- | --- |
| well double, depleted gas field | 2.54E-11 | p |
| supercritical CO2, w/o recompression | 0.2 | tkm |

Table SI10. Well double, depleted gas field from (Wildbolz, 2007)

| **Resources** |  | Per unit |
| --- | --- | --- |
| Occupation, industrial area | 900 | m2a |
| Occupation, industrial area, vegetation | 8100 | m2a |
| Transformation from unknown | 600 | m2 |
| Transformation, to industrial area | 60 | m2 |
| Transformation, to industrial area, vegetation | 540 | m2 |
| **Materials/fuels** |  |  |
| drilling, deep borehole for HDR | 1.13E+04 | m |
| Cement, unspecified, at plant/CH U | 1.26E+05 | kg |
| Gravel, unspecified, at mine/CH U | 1.32E+06 | kg |
| Transport, lorry 28t/CH U | 2.89E+04 | tkm |
| Transport, freight, rail/CH U | 1.26E+04 | tkm |
